# Supplementary material
Source: PubMed Central journal article supplement (PMC2504842)
Supplement: 0804660105_0804660105SI.pdf [file 0804660105_0804660105SI.pdf]

# Supporting Information

Delviks-Frankenberry *et al.* 10.1073/pnas.0804660105

**Table 1. Prevalence of cn mutations in treatment-experienced patients**

| Mutation | No. of sequences containing a cn mutation* (%) | No. of sequences containing both a cn mutation and one or more TAM (%) | Probability of having a cn mutation with one or more TAM <sup>†</sup> |
|----------|------------------------------------------------|------------------------------------------------------------------------|-----------------------------------------------------------------------|
| E312Q    | 16/1667 (1)                                    | 11/16 (69)                                                             | $P = 0.20$                                                            |
| G335C    | 7/1221 (0.6)                                   | 4/7 (57)                                                               | $P = 0.61$                                                            |
| G335D    | 16/1221 (1.3)                                  | 6/16 (38)                                                              | $P = 0.95$                                                            |
| N348I    | 39/1022 (3.8)                                  | 29/39 (74)                                                             | $P = 0.0098$                                                          |
| A360V    | 51/991 (5.1)                                   | 44/51 (86)                                                             | $P = 0.000001$                                                        |
| A360I    | 2/991 (0.2)                                    | 2/2 (100)                                                              | $P = 0.30$                                                            |
| V365I    | 35/987 (3.5)                                   | 25/35 (71)                                                             | $P = 0.035$                                                           |
| A376S    | 51/972 (5.2)                                   | 26/51 (51)                                                             | $P = 0.78$                                                            |
| Total    | 217/972 <sup>‡</sup> (21)                      | 147/217 (68)                                                           | $P = 0.000013$                                                        |

\*Data were obtained from the Stanford HIV Drug Resistance Database.

<sup>†</sup>Two proportions tests were performed by comparing the number of cn mutations with at least 1 TAM (e.g., 11 for E312Q) to the total number of sequences containing at least 1 TAM (537 of 972), against the number of cn mutations without a TAM (e.g., five for E312Q) to the total number of sequences without a TAM (435 of 972).

<sup>‡</sup>A total of 972 sequences were used because the number analyzable sequences decreases as the sequence is extended toward the RNase H domain.
